# Supplementary material for: Effect of anthocyanins on gut health markers, Firmicutes-Bacteroidetes ratio and short-chain fatty acids: a systematic review via meta-analysis
Source: PubMed Central journal article supplement (PMC9889808; doi:10.1038/s41598-023-28764-0), 2023-01-31
Supplement: 41598_2023_28764_MOESM2_ESM.pdf [file 41598_2023_28764_MOESM2_ESM.pdf]

# Effect of anthocyanins on gut health markers, *Firmicutes-Bacteroidetes* ratio and short-chain fatty acids: A systematic review via meta-analysis

Payal Kapoor

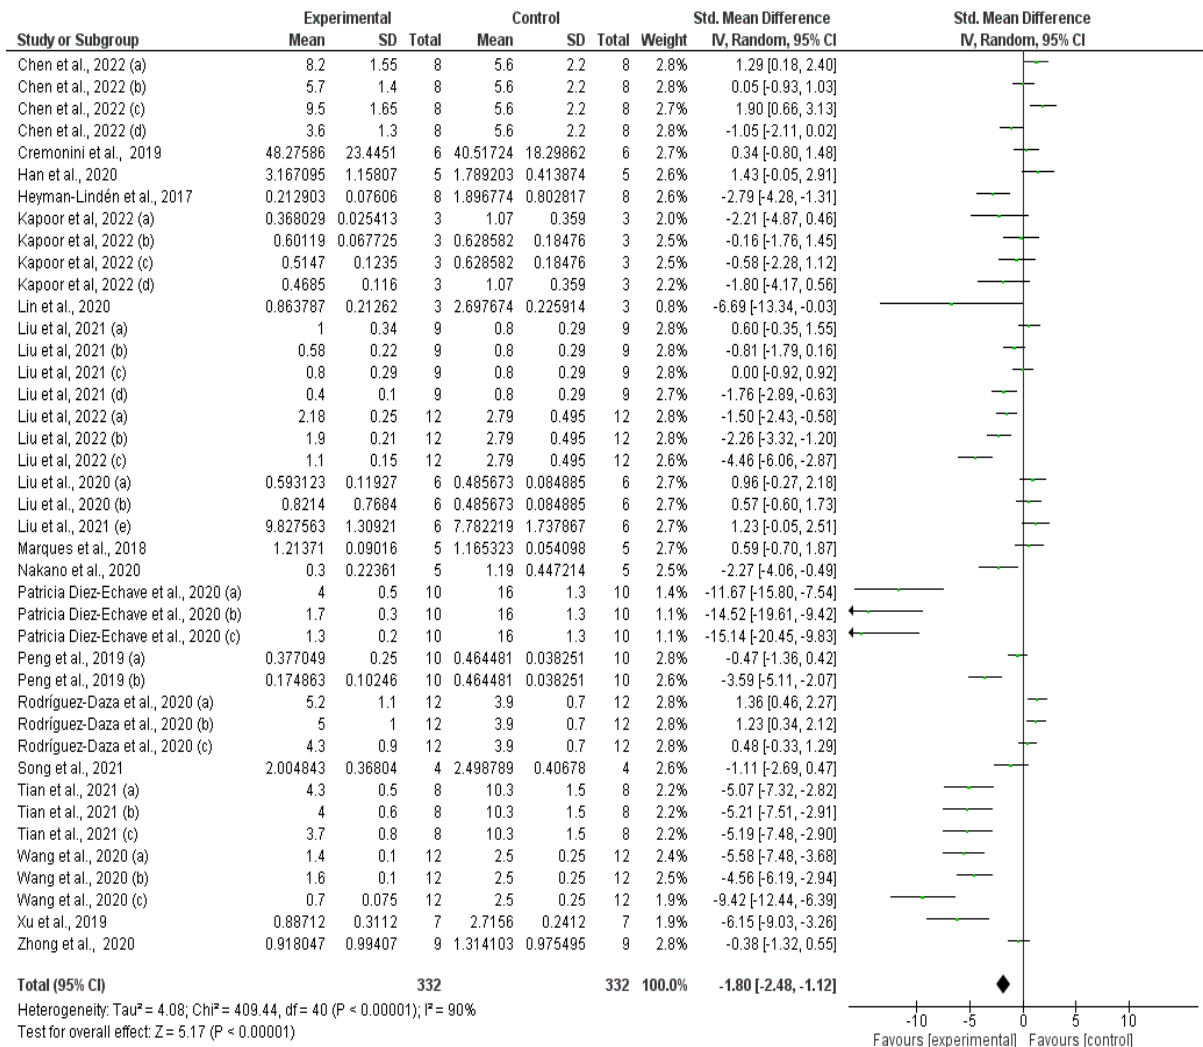

S Figure 1: Forest plot of studies investigating the effect of anthocyanin supplementation on the *Firmicutes* to *Bacteroidetes* ratio (Fir/Bac). Pooled effect estimates (diamonds) for Fir/Bac are shown. Values are standardized mean differences with 95% CIs determined with the use of random-effects models. Heterogeneity was quantified by  $I^2$ , inverse variance and standardised mean difference (SMD).

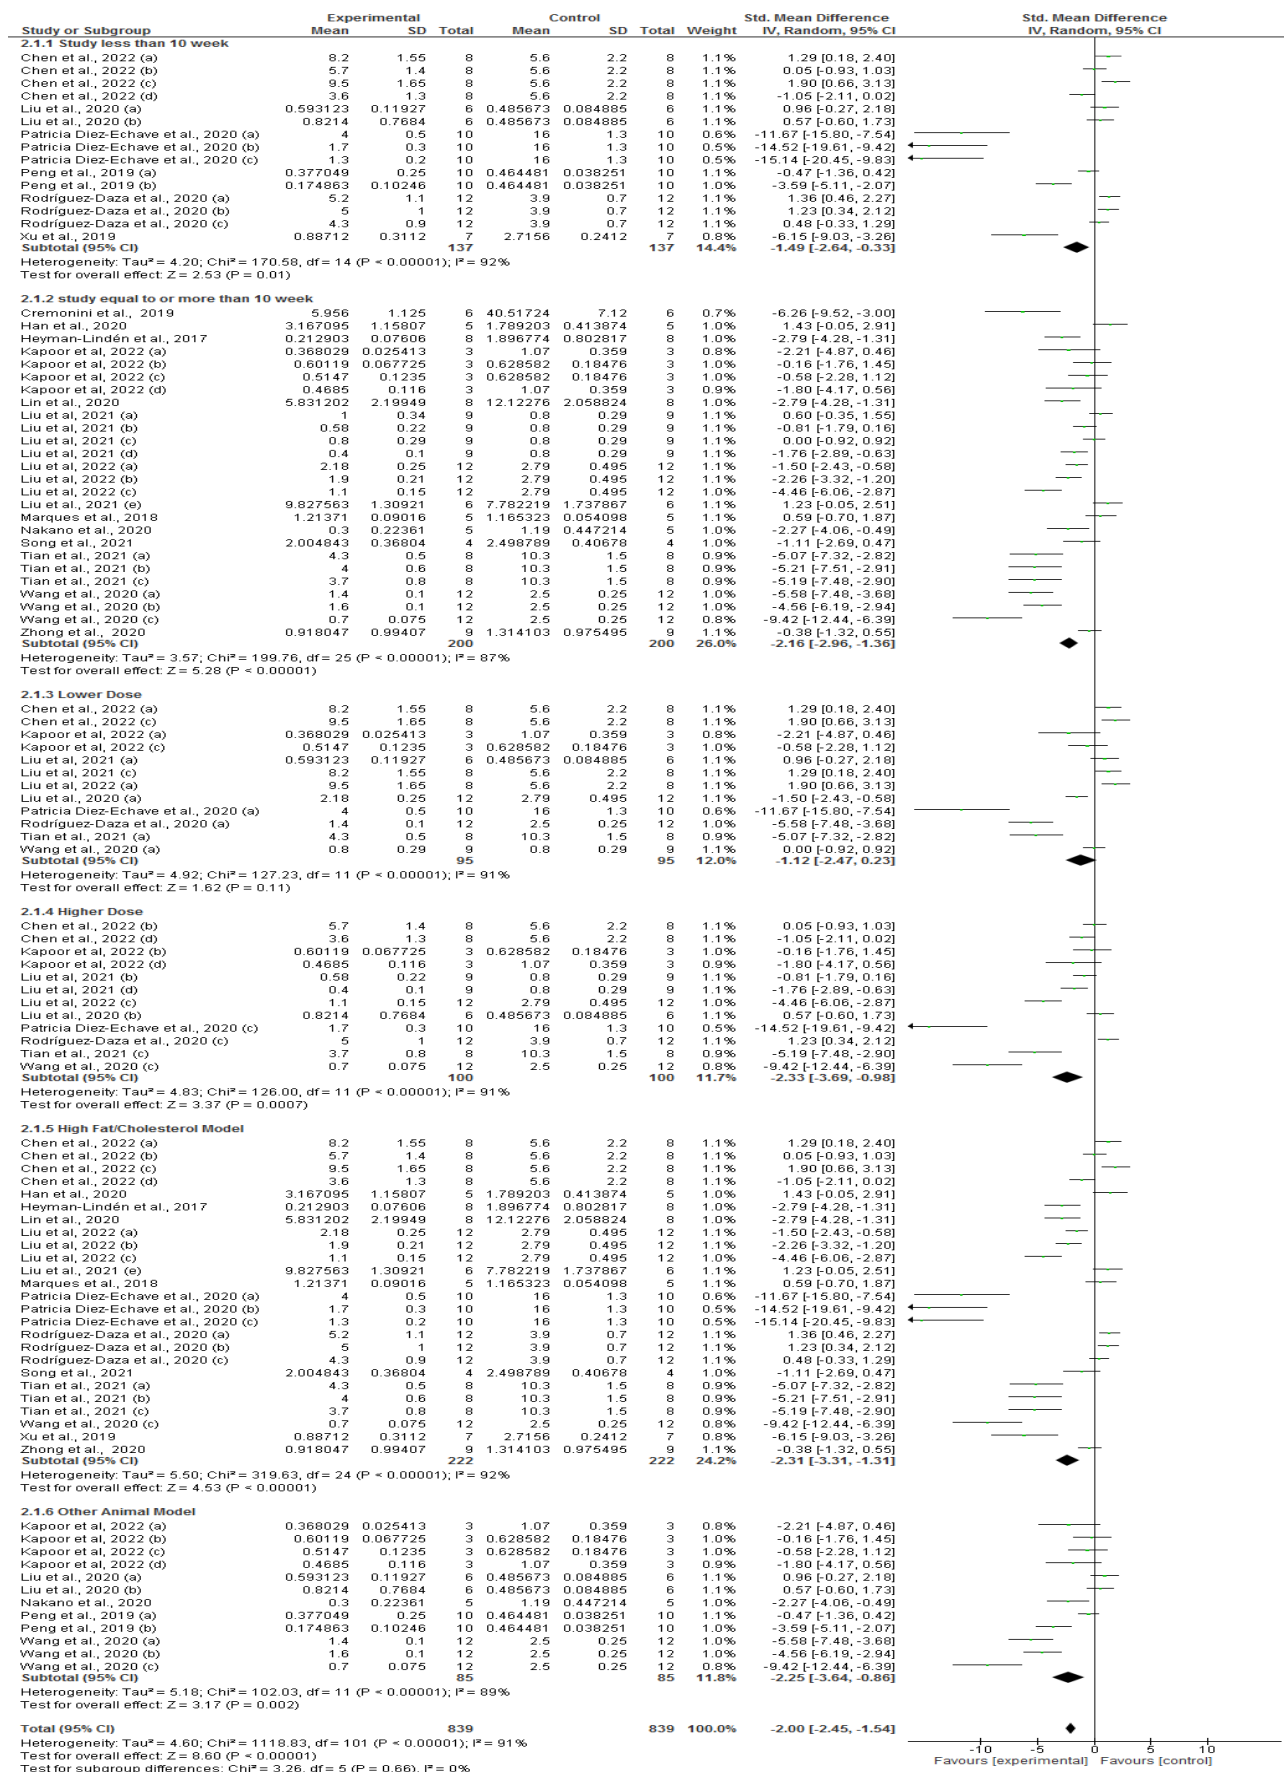

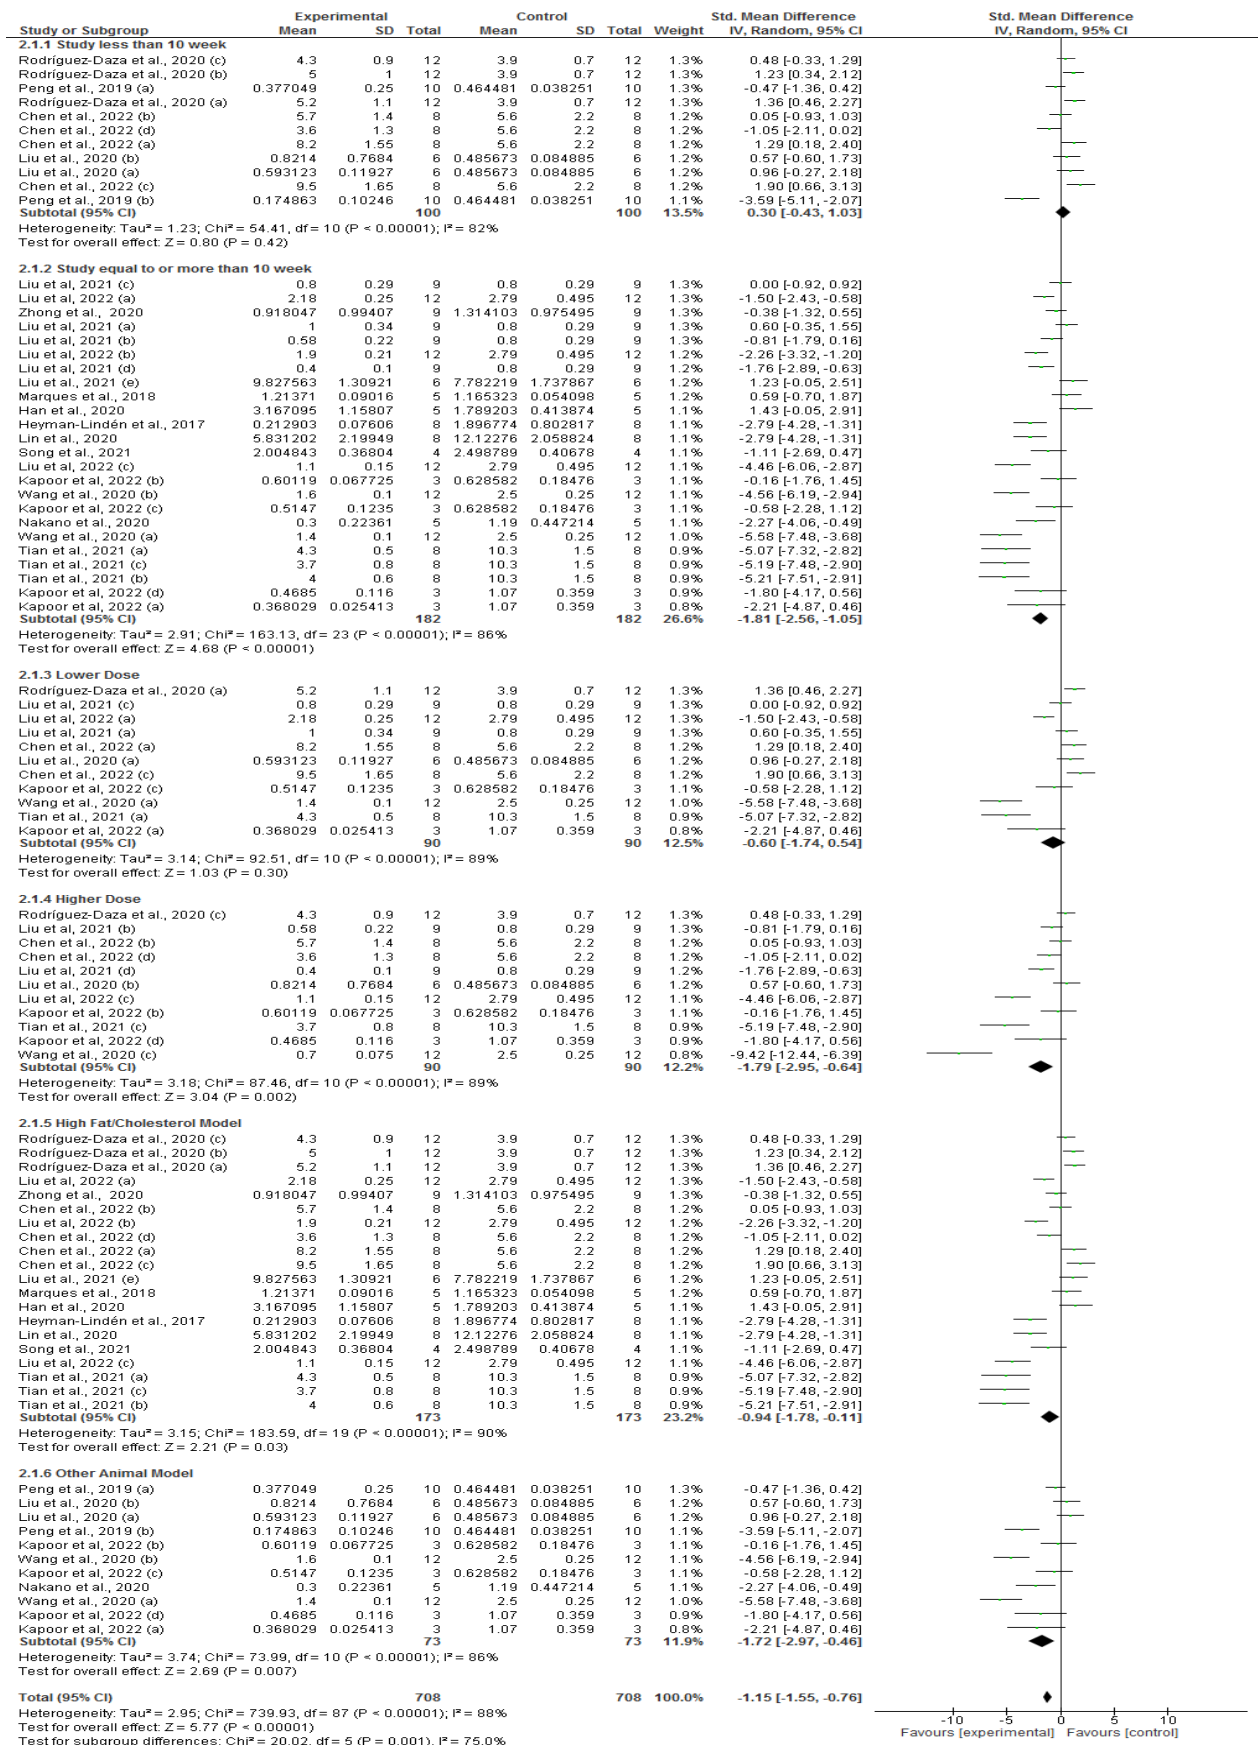

| Question: Should Anthocyanin Rich vs Normal Diet be used for Fir/Bac?                                               |                         |                      |                         |                        |                  |                                                                 |                       |                       |                          |                                                                                                            |                                                |
|---------------------------------------------------------------------------------------------------------------------|-------------------------|----------------------|-------------------------|------------------------|------------------|-----------------------------------------------------------------|-----------------------|-----------------------|--------------------------|------------------------------------------------------------------------------------------------------------|------------------------------------------------|
| Bibliography: . [Intervention] for [health problem]. Cochrane Database of Systematic Reviews [Year], Issue [Issue]. |                         |                      |                         |                        |                  |                                                                 |                       |                       |                          |                                                                                                            |                                                |
| Quality assessment                                                                                                  |                         |                      |                         |                        |                  |                                                                 | Summary of Findings   |                       |                          |                                                                                                            |                                                |
| Participants (studies) Follow up                                                                                    | Risk of bias            | Inconsistency        | Indirectness            | Imprecision            | Publication bias | Overall quality of evidence                                     | Study event rates (%) |                       | Relative effect (95% CI) | Anticipated absolute effects                                                                               |                                                |
|                                                                                                                     |                         |                      |                         |                        |                  |                                                                 | With Normal Diet      | With Anthocyanin Rich |                          | Risk with Normal Diet                                                                                      | Risk difference with Anthocyanin Rich (95% CI) |
| <b>Fir/Bac</b> (Better indicated by higher values)                                                                  |                         |                      |                         |                        |                  |                                                                 |                       |                       |                          |                                                                                                            |                                                |
| 536 (34 studies)                                                                                                    | no serious risk of bias | serious <sup>1</sup> | no serious indirectness | no serious imprecision | undetected       | ⊕⊕⊕⊕<br>HIGH <sup>1</sup><br>due to inconsistency, large effect | 268                   | 268                   | -                        | The mean fir/bac in the intervention groups was <b>0.89 standard deviations lower</b> (1.47 to 0.31 lower) |                                                |

<sup>1</sup> High heterogeneity

S Figure 4: Fir/Bac data quality assessment using GRADE tool.

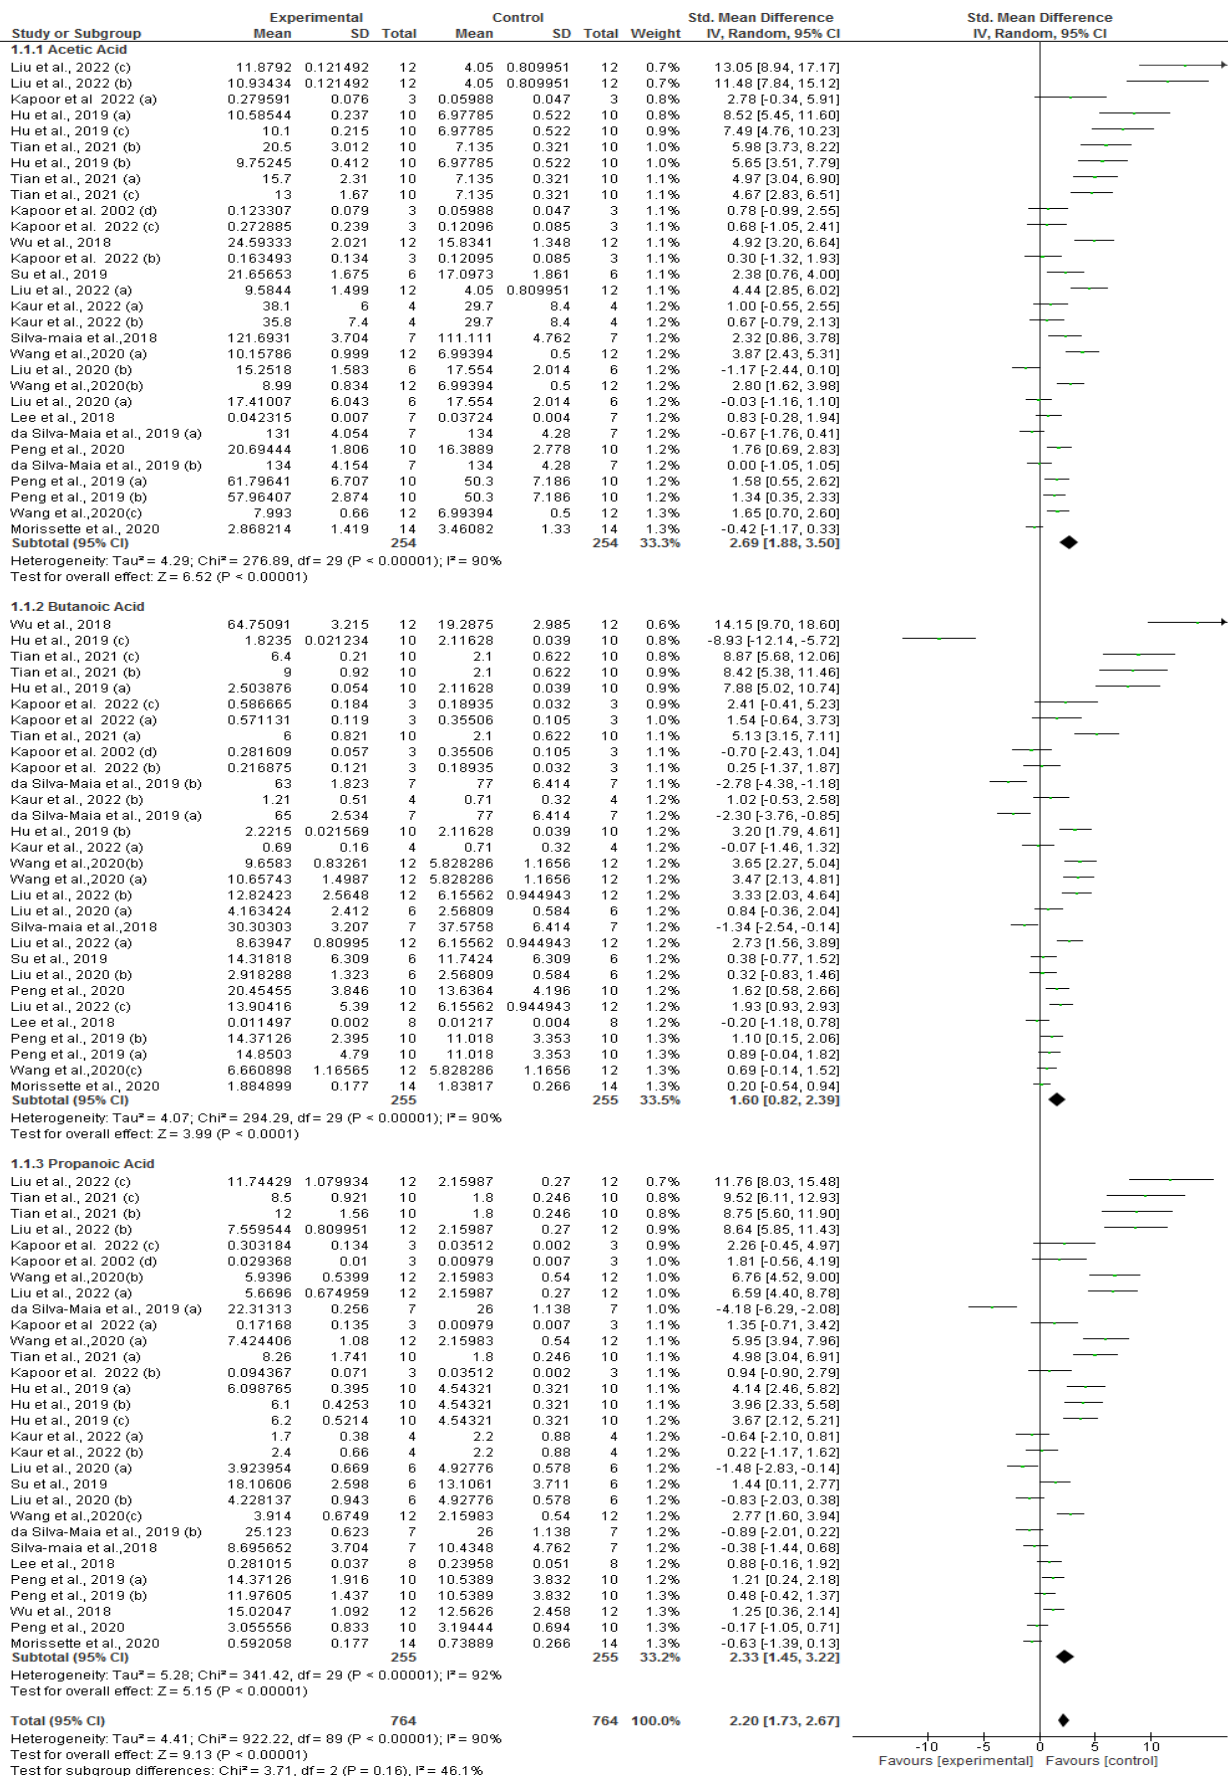

S Figure 5: Forest plot of studies investigating the sub-grouped based effect of anthocyanin supplementation on the SCFA profile. Sub-grouping was on the basis of proportion of acetic acid, butanoic acid and propionic acid. Pooled effect estimates are shown by diamonds. Values are standardized mean differences with 95% CIs determined with the use of random-effects models. Heterogeneity was quantified by I<sup>2</sup>, inverse variance and standardised mean difference (SMD).



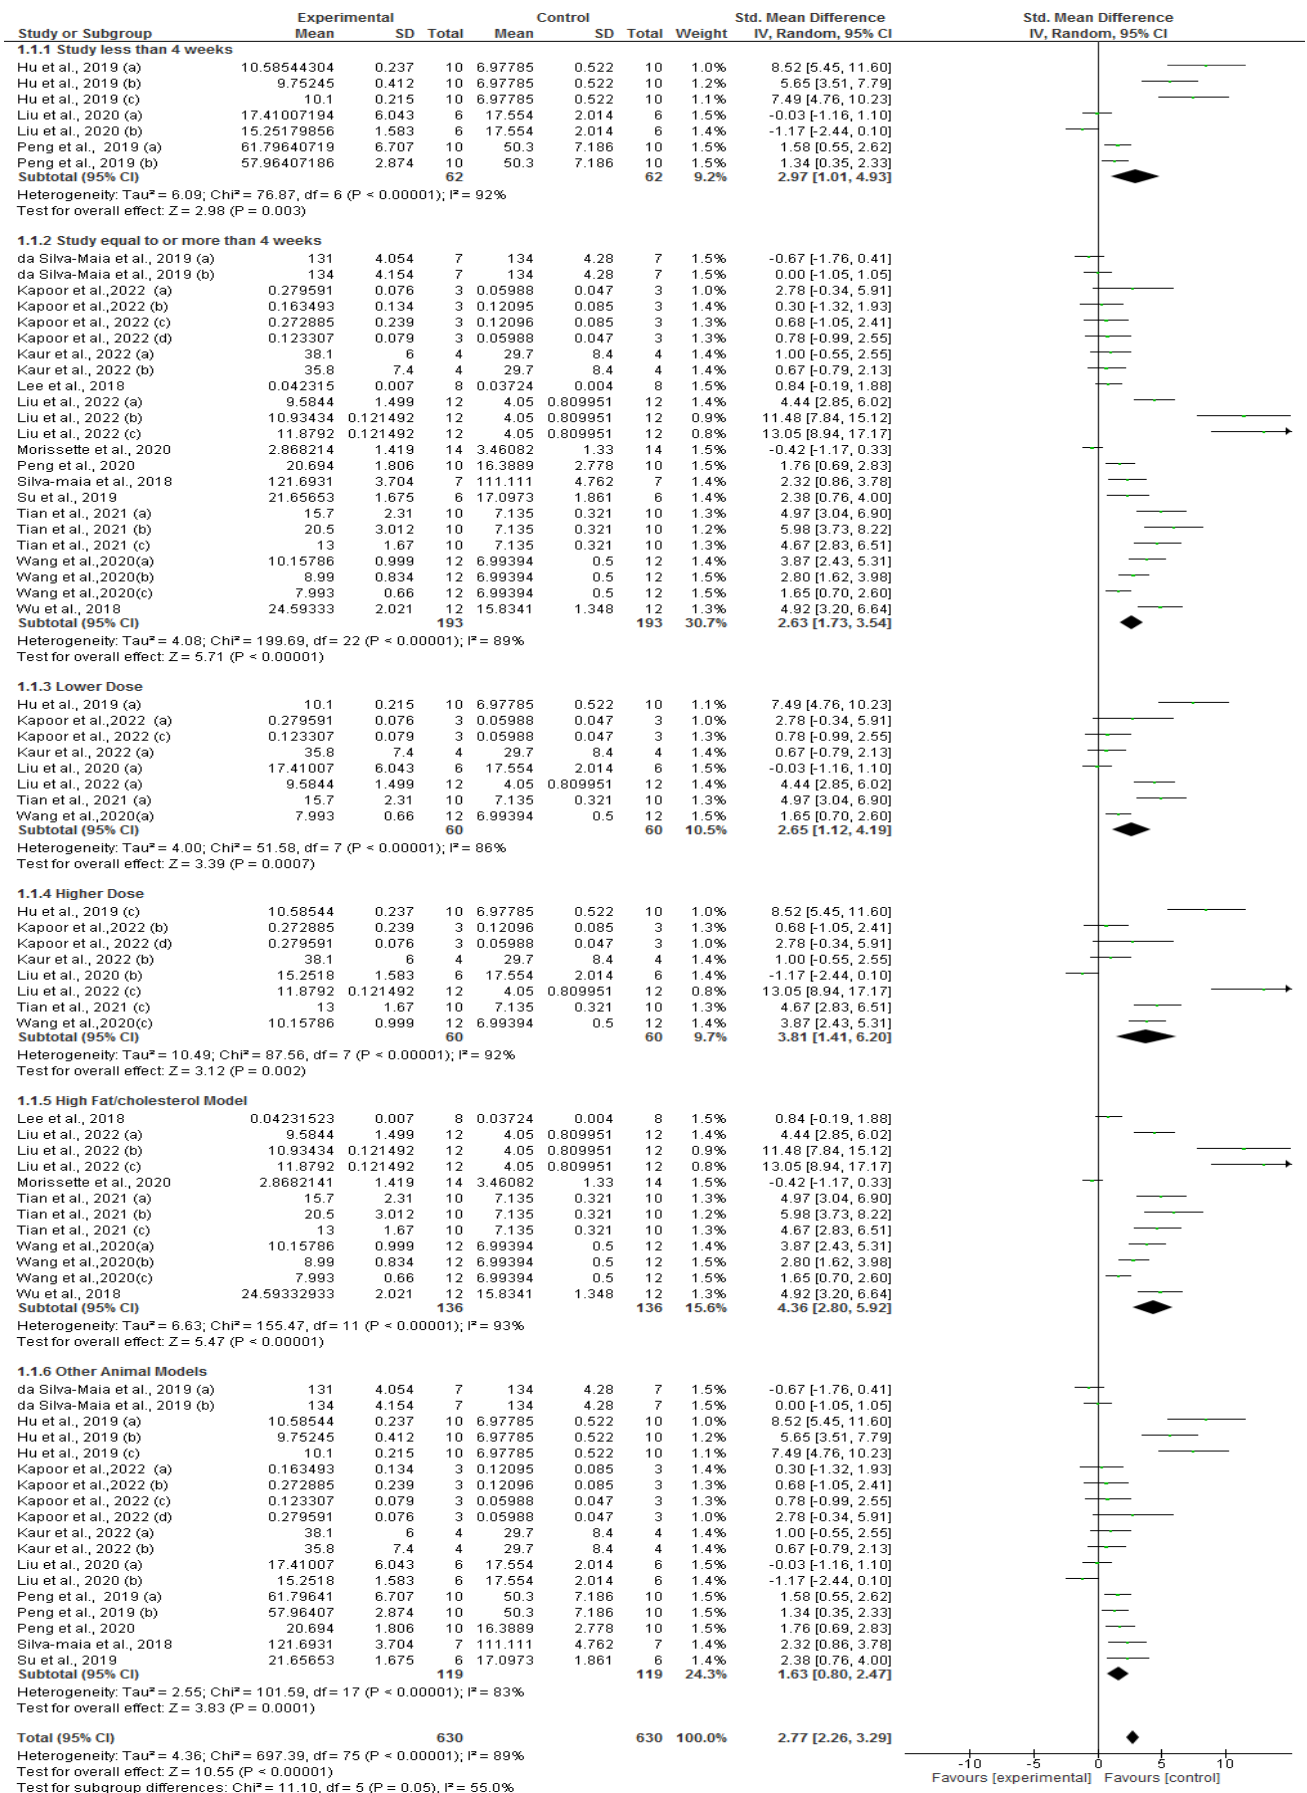

S Figure 6: Forest plot of the sub-group analysis to study effect of anthocyanin supplementation on the acetic acid, SCFA. Sub-grouping was on the basis of duration of the study, dose of the anthocyanin given and disease status of the subjects (animal models). Values are standardized mean differences with 95% CIs determined with the use of random-effects models. Heterogeneity was quantified by  $I^2$ , inverse variance and standardised mean difference (SMD).

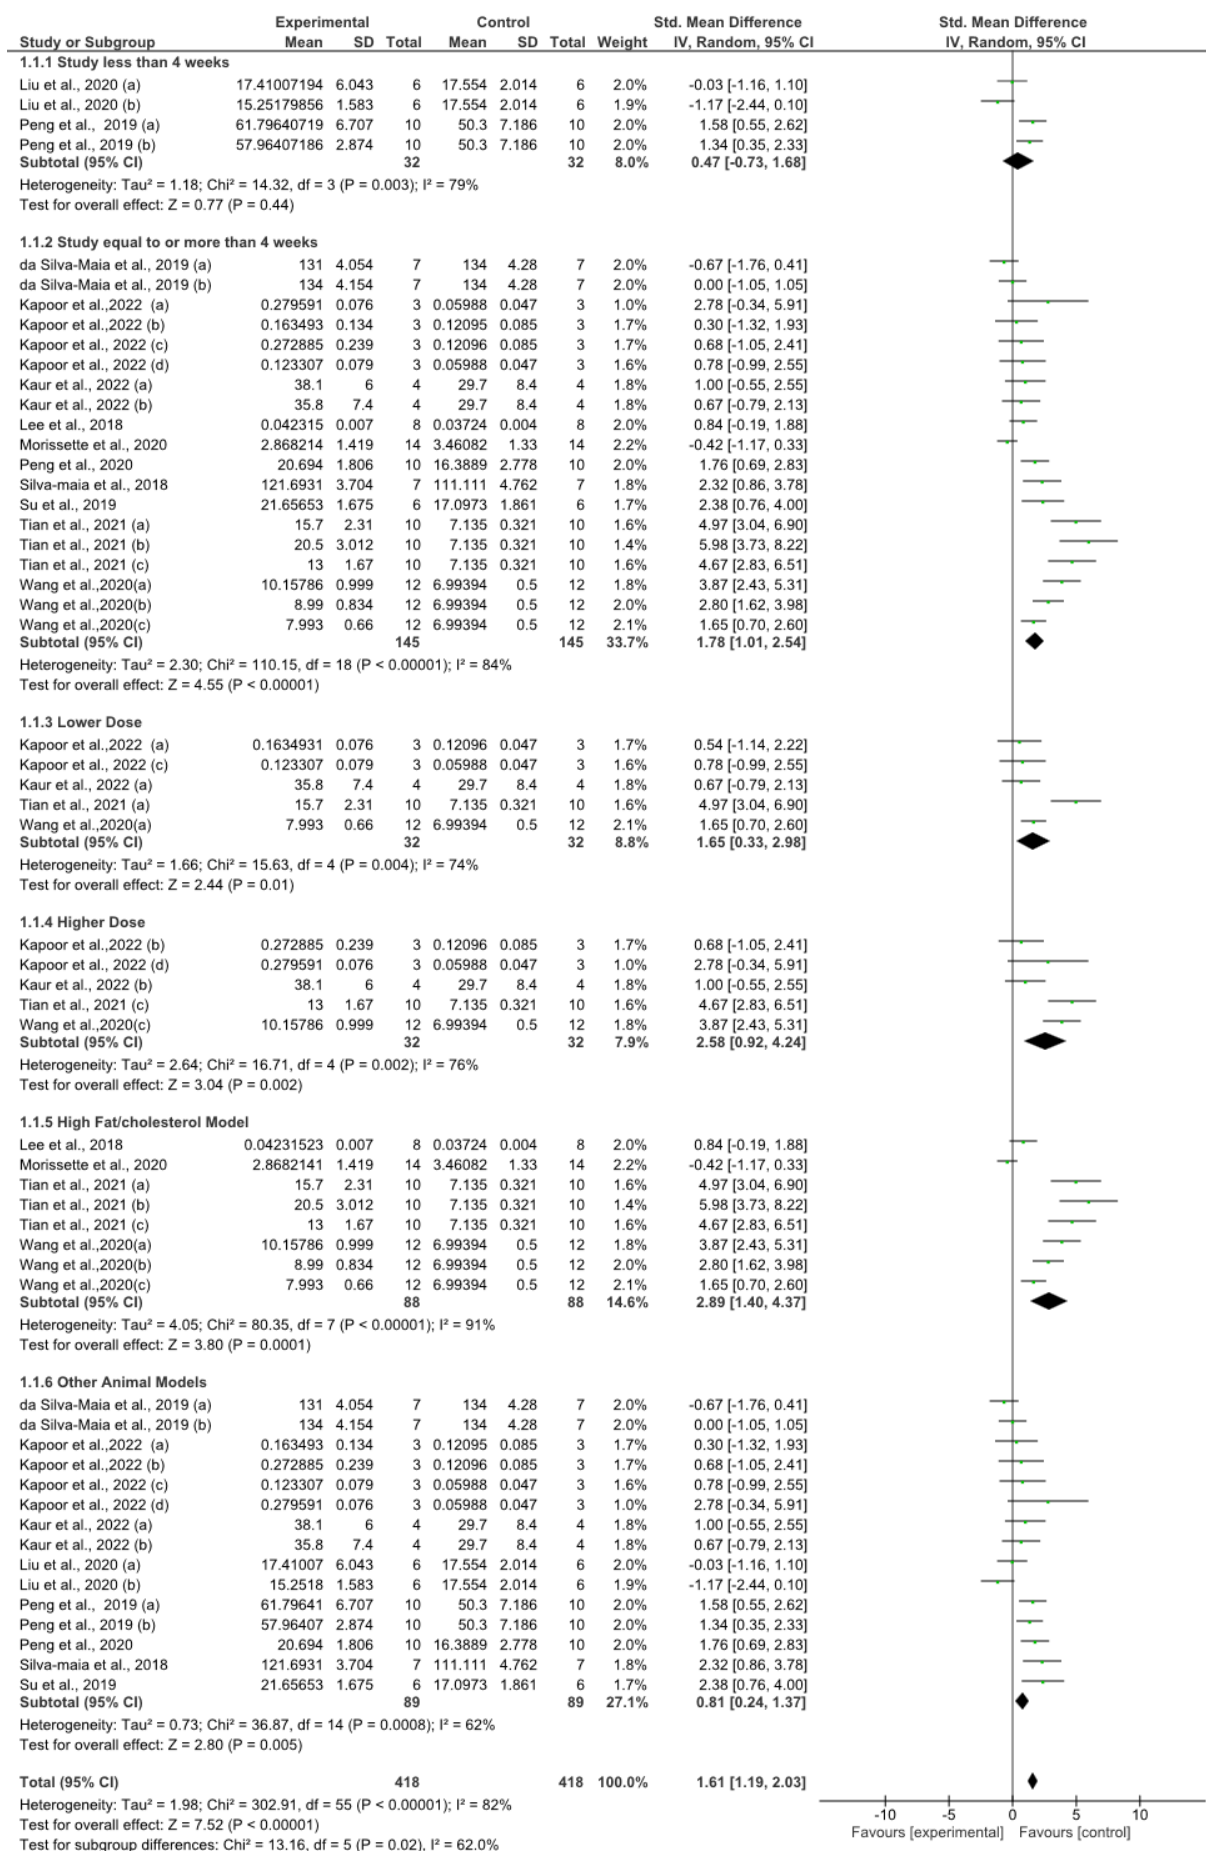

S Figure 7: Forest plot of the sub-group analysis after elimination of high-influencer studies, for understanding the effect of anthocyanin supplementation on the acetic acid, SCFA type. Sub-grouping was on the basis of duration of the study, dose of the anthocyanin given and disease status of the subjects (animal models). Values are standardized mean differences with 95% CIs determined with the use of random-effects models. Heterogeneity was quantified by I<sup>2</sup>, inverse variance and standardised mean difference (SMD).

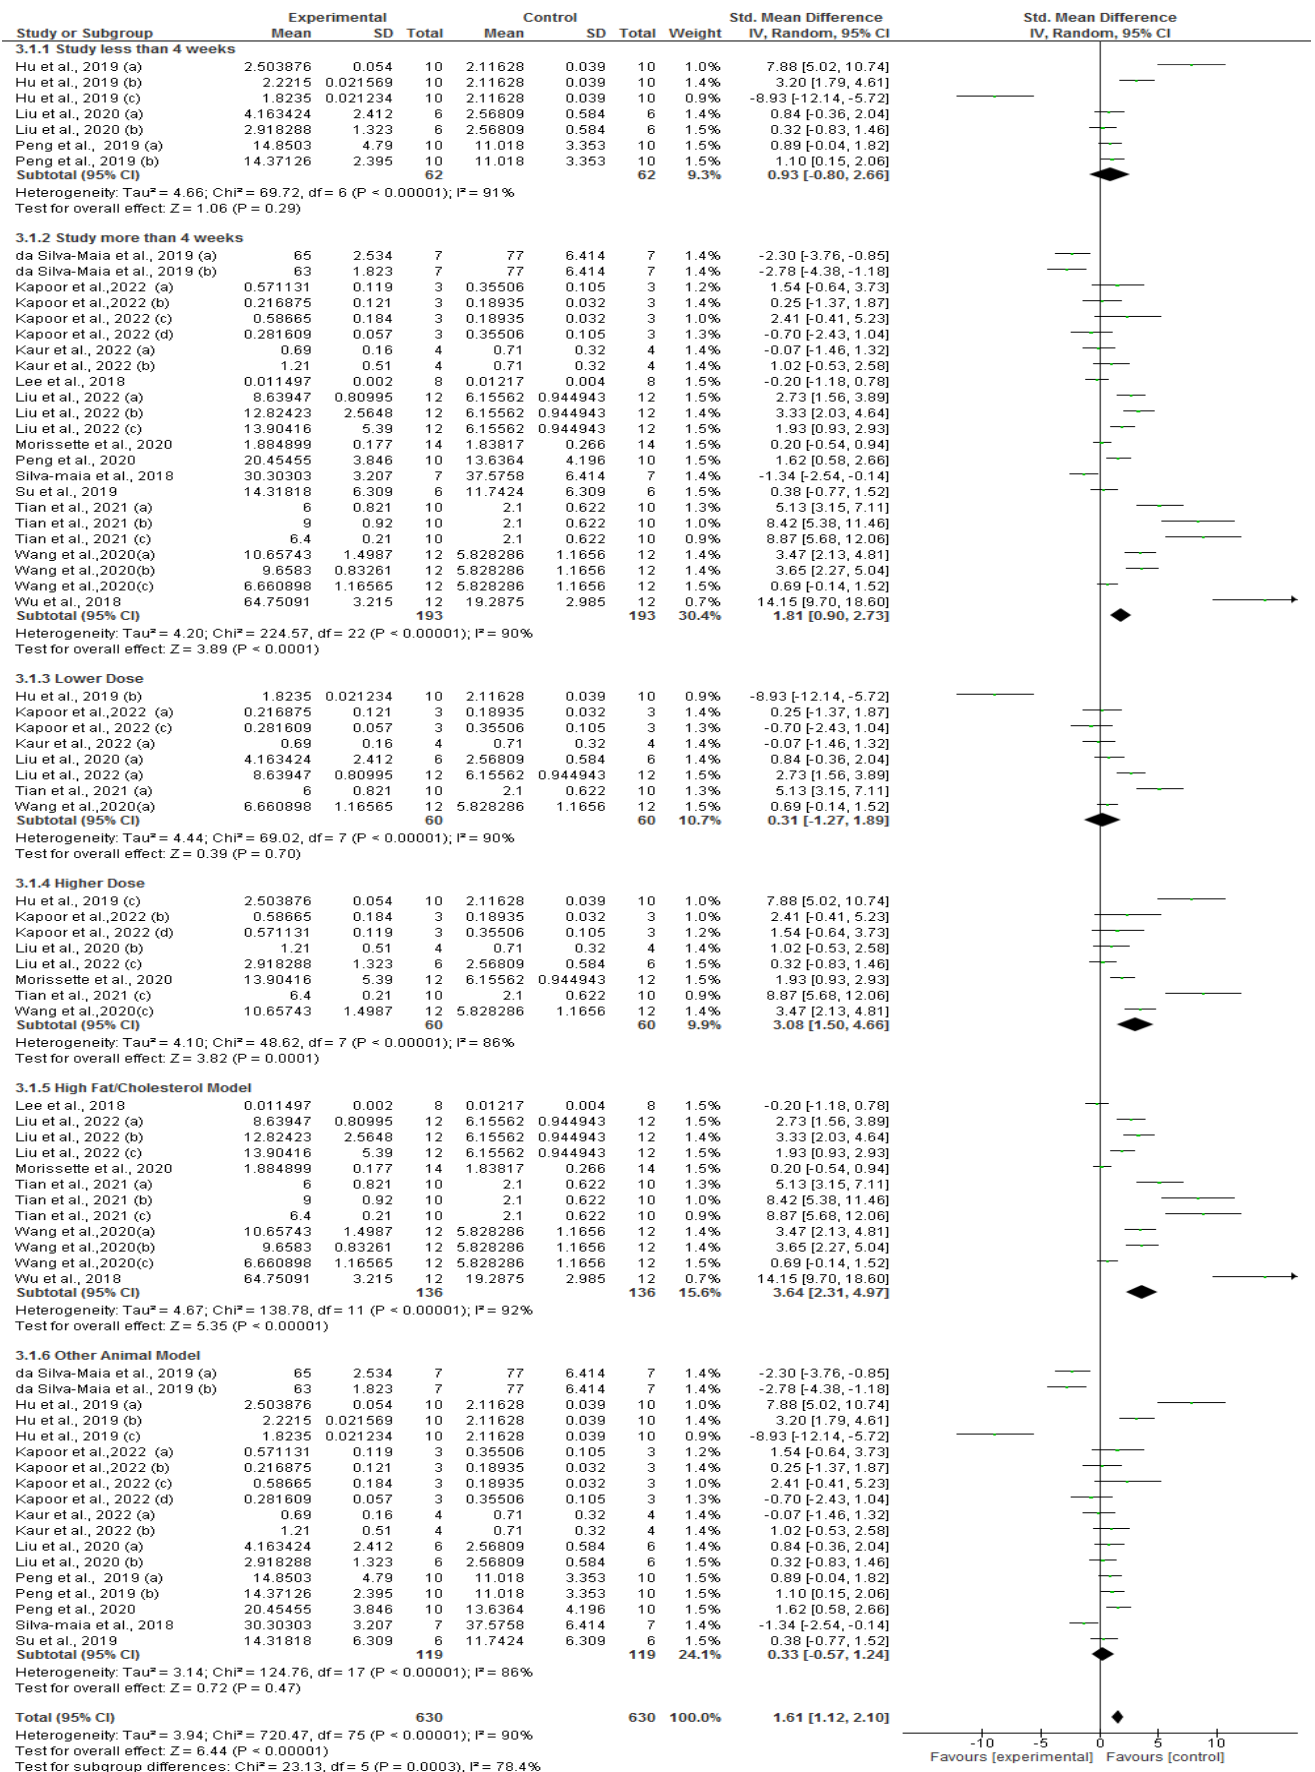

S Figure 8: Forest plot of the sub-group analysis to study effect of anthocyanin supplementation on the butanoic acid, SCFA type. Sub-grouping was on the basis of duration of the study, dose of the anthocyanin given and disease status of the subjects (animal models). Values are standardized mean differences with 95% CIs determined with the use of random-effects models. Heterogeneity was quantified by I<sup>2</sup>, inverse variance and standardised mean difference (SMD).



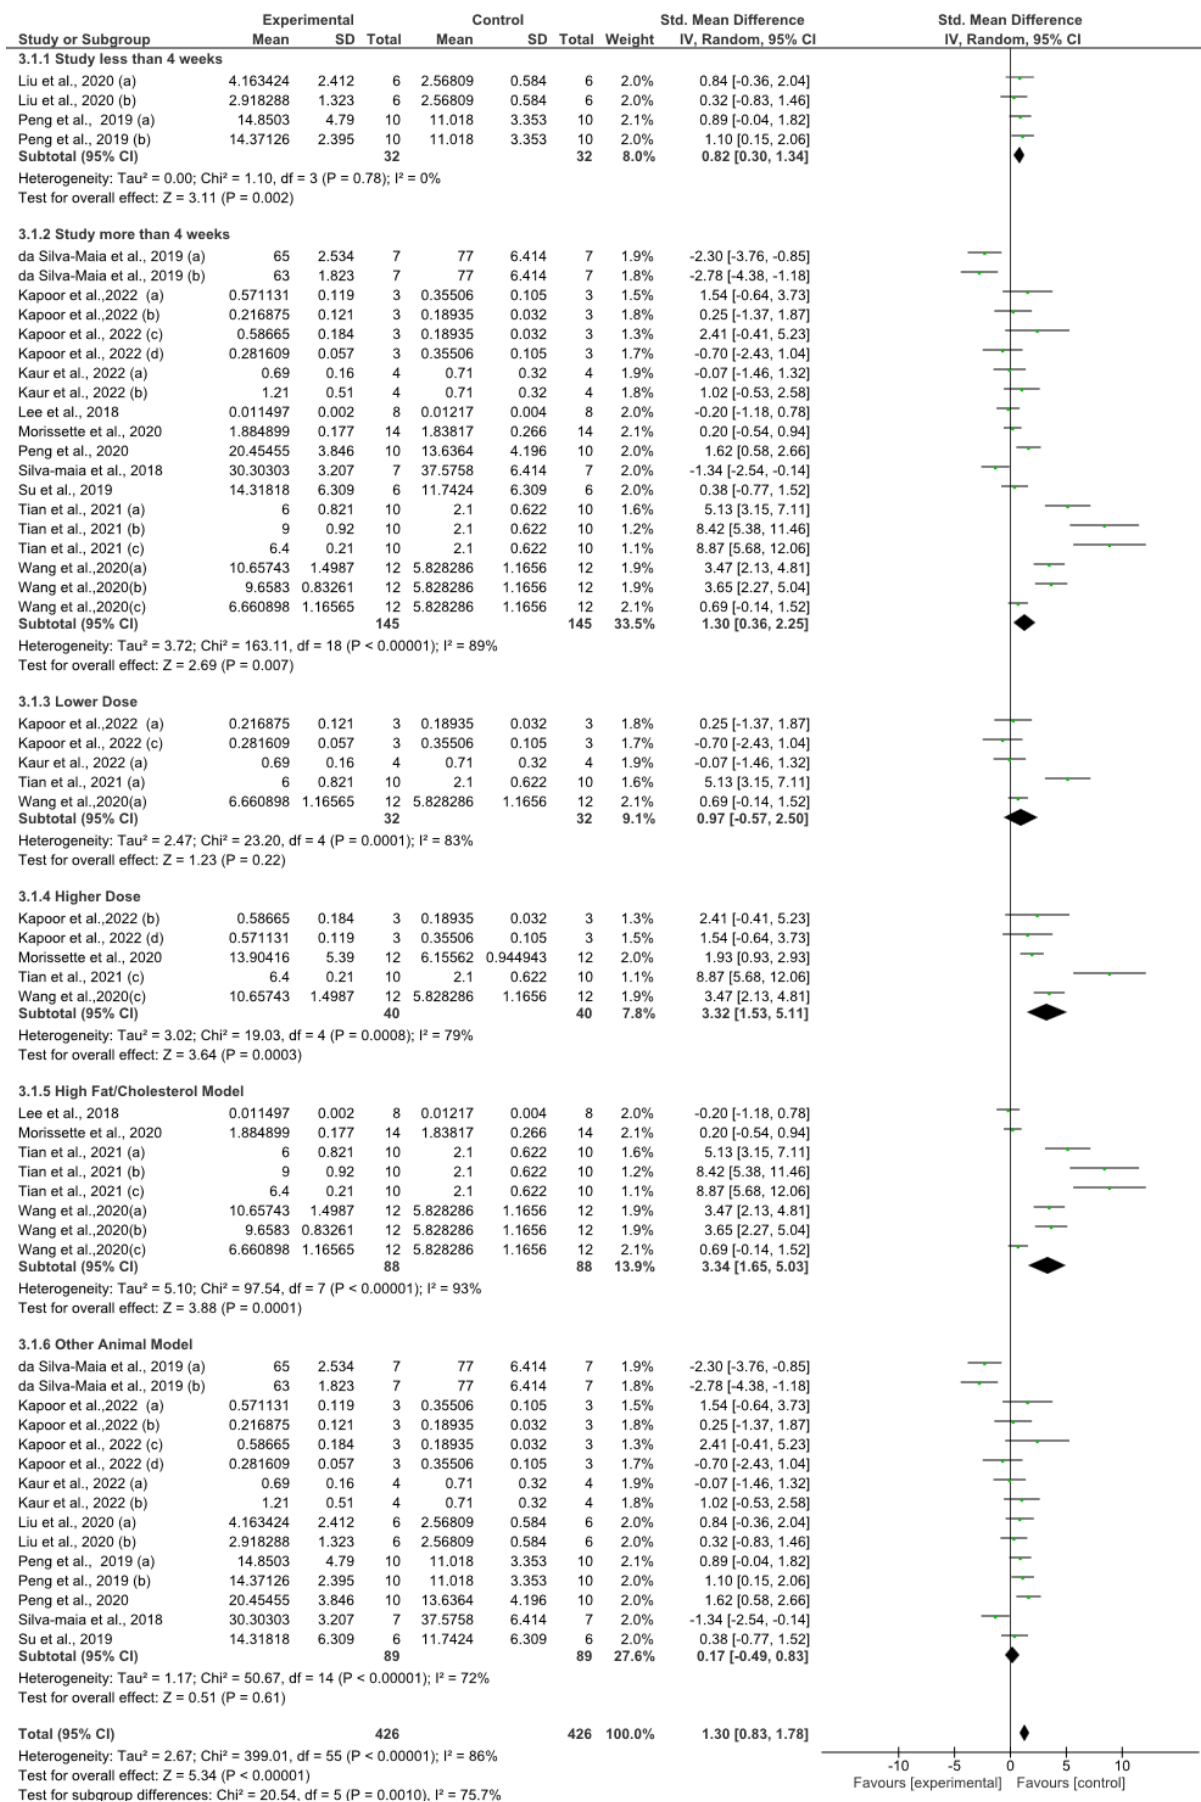

S Figure 9: Forest plot of the sub-group analysis after elimination of high-influencer studies, for understanding the effect of anthocyanin supplementation on the butanoic acid, SCFA type. Sub-grouping was on the basis of duration of the study, dose of the anthocyanin given and disease status of the subjects (animal models). Values are standardized mean differences with 95% CIs determined with the use of random-effects models. Heterogeneity was quantified by I<sup>2</sup>, inverse variance and standardised mean difference (SMD).

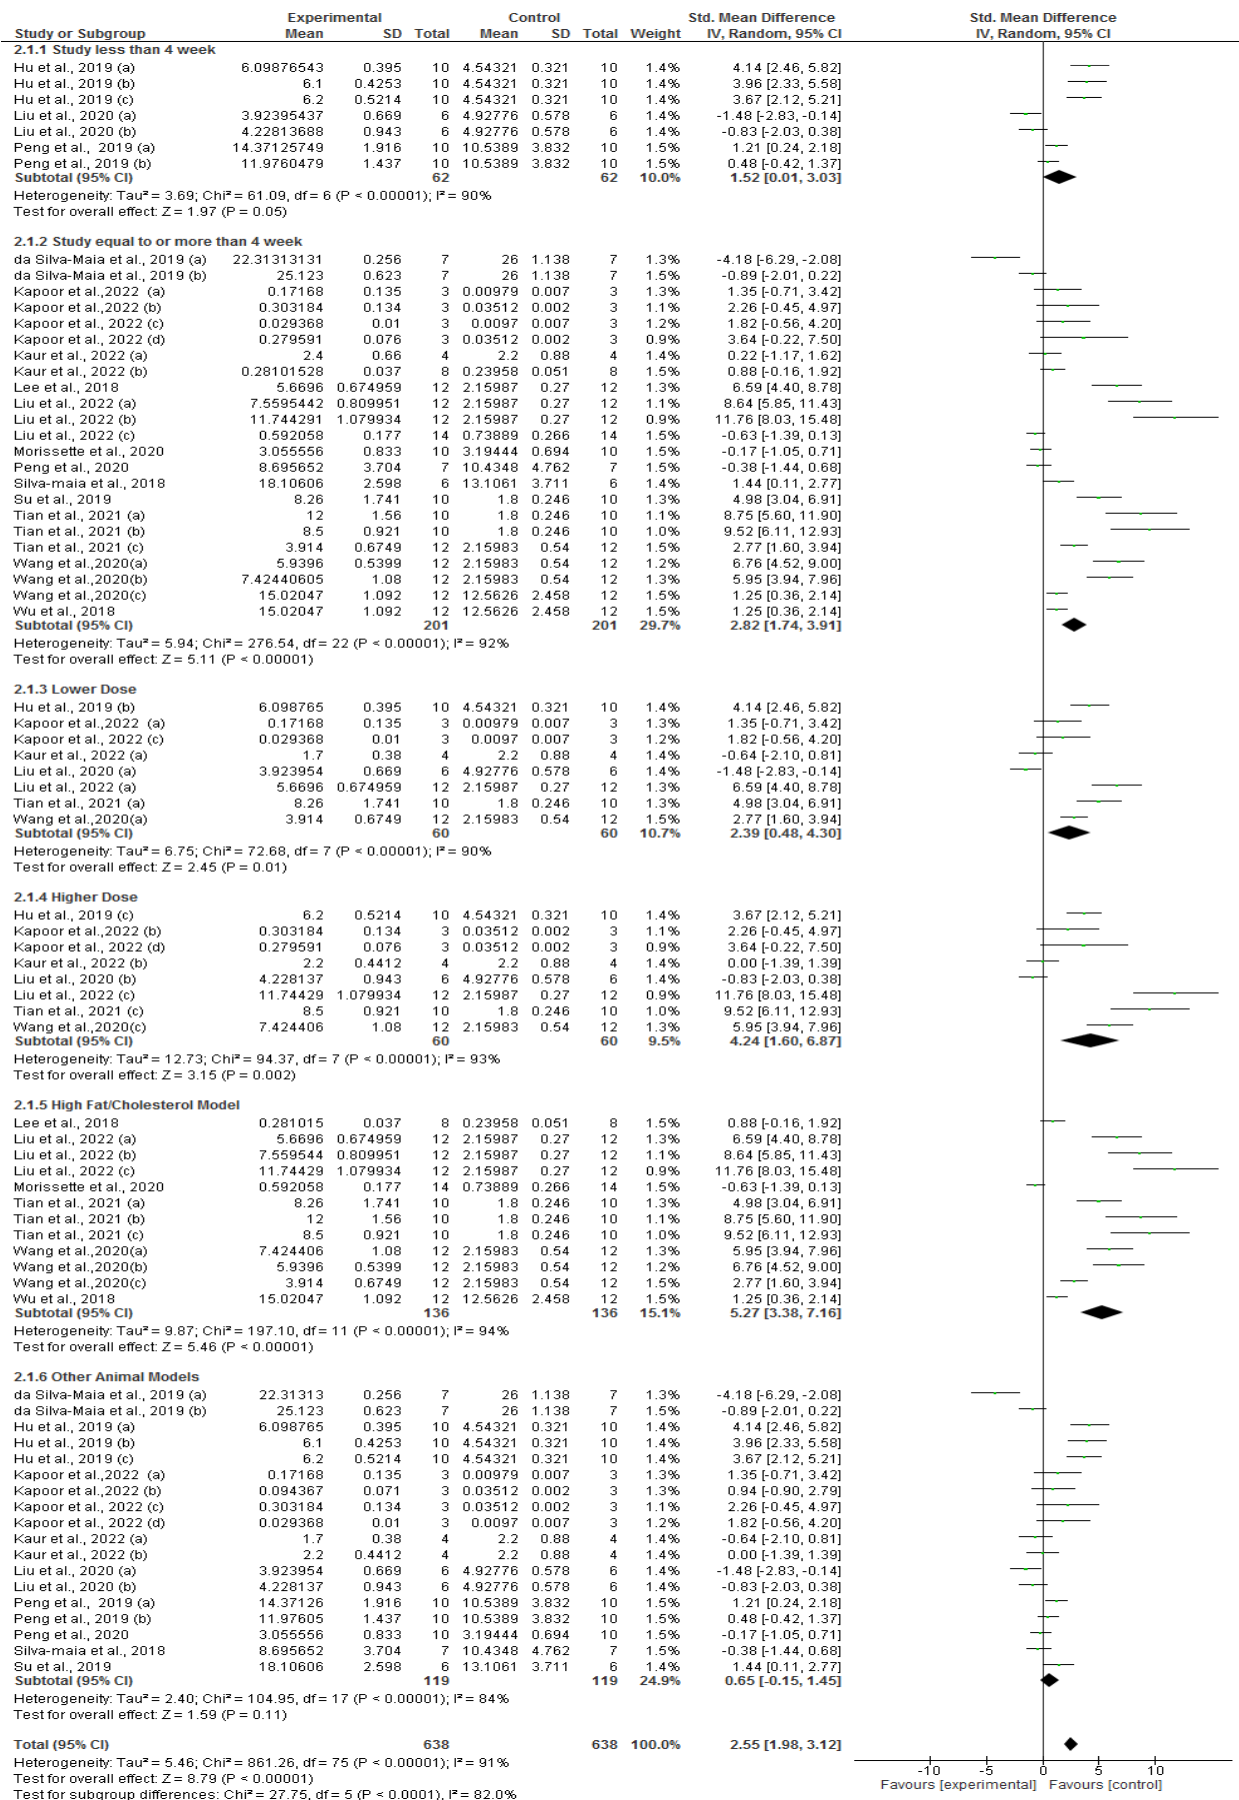

S Figure 10: Forest plot of the sub-group analysis to study effect of anthocyanin supplementation on the propionic acid, SCFA type. Sub-grouping was on the basis of duration of the study, dose of the anthocyanin given and disease status of the subjects (animal models). Values are standardized mean differences with 95% CIs determined with the use of random-effects models. Heterogeneity was quantified by I<sup>2</sup>, inverse variance and standardised mean difference (SMD).

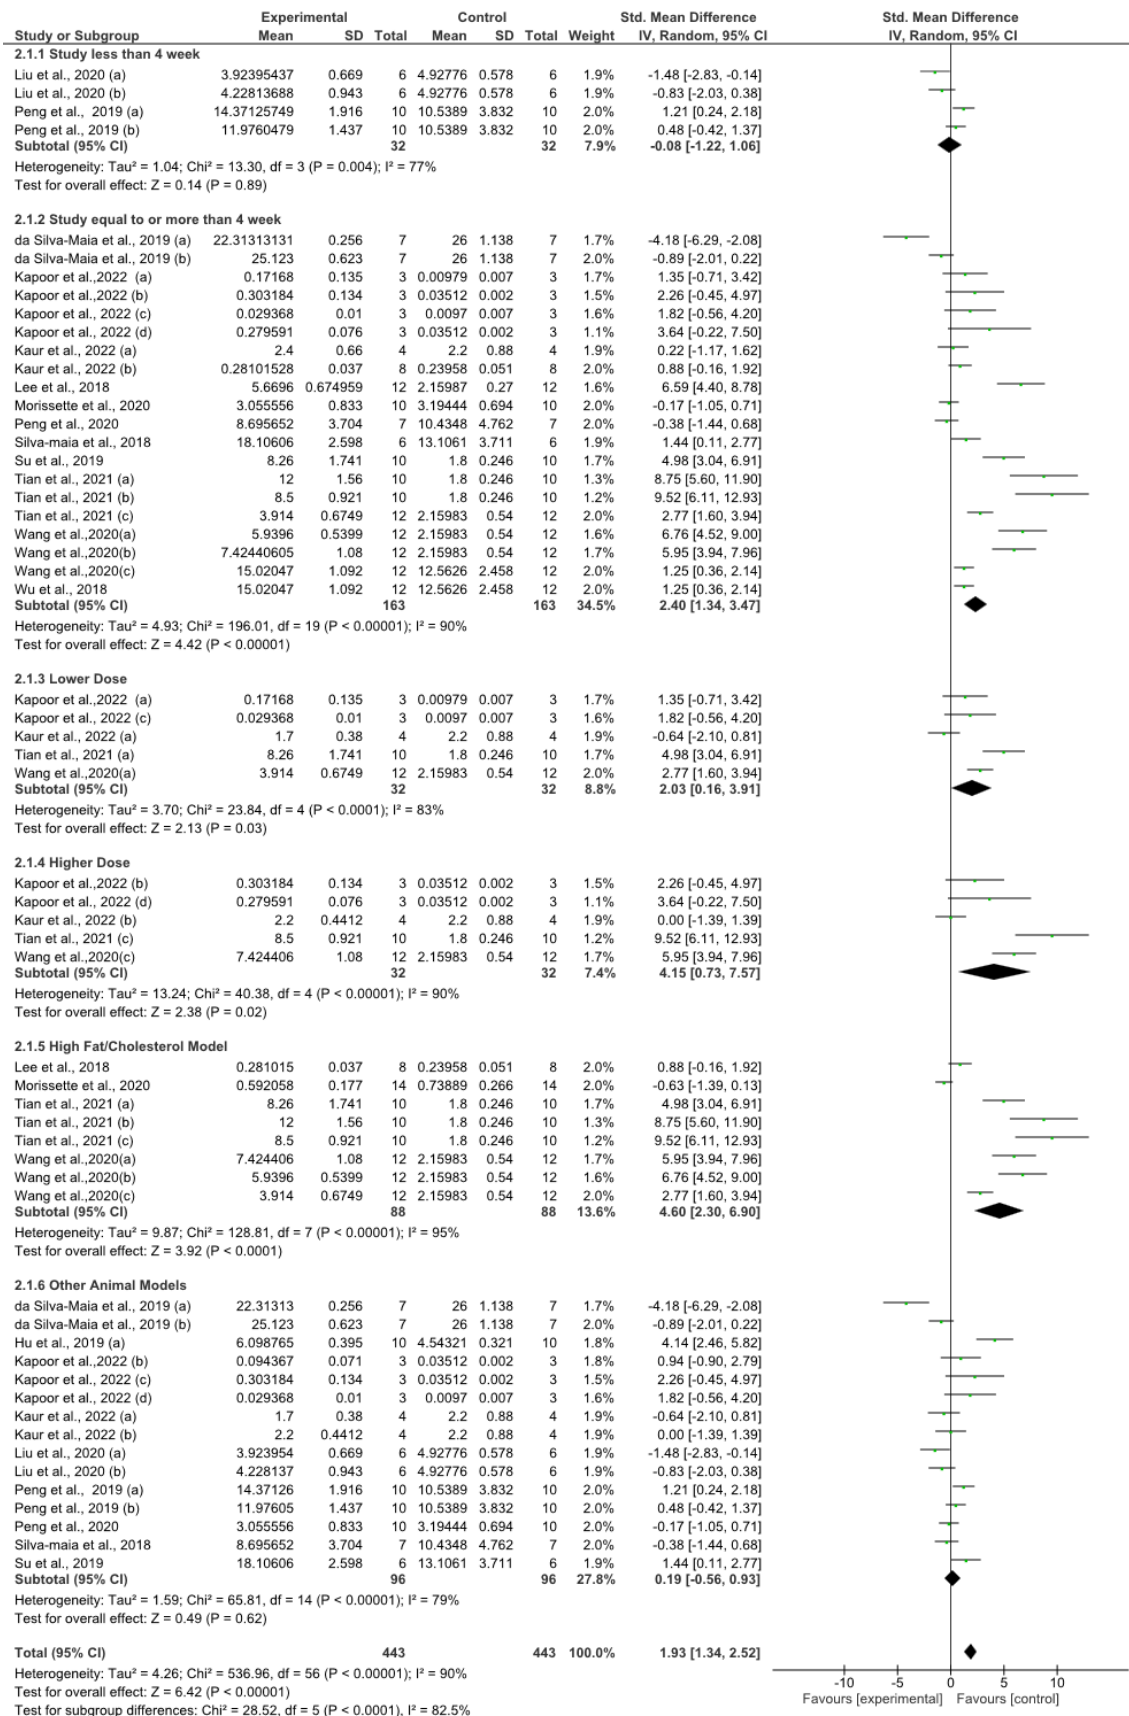

S Figure 11: Forest plot of the sub-group analysis after elimination of high-influencer studies, for understanding the effect of anthocyanin supplementation on the propionic acid, SCFA type. Sub-grouping was on the basis of duration of the study, dose of the anthocyanin given and disease status of the subjects (animal models). Values are standardized mean differences with 95% CIs determined with the use of random-effects models. Heterogeneity was quantified by I<sup>2</sup>, inverse variance and standardised mean difference (SMD).

| Question: Should Anthocyanin Rich vs Normal Diet be used for SCFA (Acetic Acid)?                   |                         |                      |                         |                        |                  |                                                                 |                       |                       |                          |                              |                                                                                                                  |
|----------------------------------------------------------------------------------------------------|-------------------------|----------------------|-------------------------|------------------------|------------------|-----------------------------------------------------------------|-----------------------|-----------------------|--------------------------|------------------------------|------------------------------------------------------------------------------------------------------------------|
| Bibliography: . [Intervention] for. Cochrane Database of Systematic Reviews [Year], Issue [Issue]. |                         |                      |                         |                        |                  |                                                                 |                       |                       |                          |                              |                                                                                                                  |
| Quality assessment                                                                                 |                         |                      |                         |                        |                  |                                                                 | Summary of Findings   |                       |                          |                              |                                                                                                                  |
| Participants (studies) Follow up                                                                   | Risk of bias            | Inconsistency        | Indirectness            | Imprecision            | Publication bias | Overall quality of evidence                                     | Study event rates (%) |                       | Relative effect (95% CI) | Anticipated absolute effects |                                                                                                                  |
|                                                                                                    |                         |                      |                         |                        |                  |                                                                 | With Normal Diet      | With Anthocyanin Rich |                          | Risk with Normal Diet        | Risk difference with Anthocyanin Rich (95% CI)                                                                   |
| <b>Acetic Acid</b> (Better indicated by lower values)                                              |                         |                      |                         |                        |                  |                                                                 |                       |                       |                          |                              |                                                                                                                  |
| 1060 (23 studies)                                                                                  | no serious risk of bias | serious <sup>1</sup> | no serious indirectness | no serious imprecision | undetected       | ⊕⊕⊕⊕<br>HIGH <sup>1</sup><br>due to inconsistency, large effect | 530                   | 530                   | -                        |                              | The mean acetic acid in the intervention groups was <b>1.52 standard deviations higher</b> (0.86 to 2.17 higher) |

<sup>1</sup> High heterogeneity

| Question: Should Anthocyanin Rich vs Normal Diet be used for SCFA (Propionic Acid)?                |                         |                      |                         |                        |                  |                                                                 |                       |                       |                          |                              |                                                                                                                     |
|----------------------------------------------------------------------------------------------------|-------------------------|----------------------|-------------------------|------------------------|------------------|-----------------------------------------------------------------|-----------------------|-----------------------|--------------------------|------------------------------|---------------------------------------------------------------------------------------------------------------------|
| Bibliography: . [Intervention] for. Cochrane Database of Systematic Reviews [Year], Issue [Issue]. |                         |                      |                         |                        |                  |                                                                 |                       |                       |                          |                              |                                                                                                                     |
| Quality assessment                                                                                 |                         |                      |                         |                        |                  |                                                                 | Summary of Findings   |                       |                          |                              |                                                                                                                     |
| Participants (studies) Follow up                                                                   | Risk of bias            | Inconsistency        | Indirectness            | Imprecision            | Publication bias | Overall quality of evidence                                     | Study event rates (%) |                       | Relative effect (95% CI) | Anticipated absolute effects |                                                                                                                     |
|                                                                                                    |                         |                      |                         |                        |                  |                                                                 | With Normal Diet      | With Anthocyanin Rich |                          | Risk with Normal Diet        | Risk difference with Anthocyanin Rich (95% CI)                                                                      |
| <b>Propionic Acid</b> (Better indicated by lower values)                                           |                         |                      |                         |                        |                  |                                                                 |                       |                       |                          |                              |                                                                                                                     |
| 1048 (25 studies)                                                                                  | no serious risk of bias | serious <sup>1</sup> | no serious indirectness | no serious imprecision | undetected       | ⊕⊕⊕⊕<br>HIGH <sup>1</sup><br>due to inconsistency, large effect | 524                   | 524                   | -                        |                              | The mean propionic acid in the intervention groups was <b>1.44 standard deviations higher</b> (0.56 to 2.23 higher) |

<sup>1</sup> High heterogeneity

| Question: Should Anthocyanin Rich vs Normal Diet be used for SCFA (Butanoic Acid)?                 |                         |                      |                         |                        |                  |                                                                 |                       |                       |                          |                              |                                                                                                                   |
|----------------------------------------------------------------------------------------------------|-------------------------|----------------------|-------------------------|------------------------|------------------|-----------------------------------------------------------------|-----------------------|-----------------------|--------------------------|------------------------------|-------------------------------------------------------------------------------------------------------------------|
| Bibliography: . [Intervention] for. Cochrane Database of Systematic Reviews [Year], Issue [Issue]. |                         |                      |                         |                        |                  |                                                                 |                       |                       |                          |                              |                                                                                                                   |
| Quality assessment                                                                                 |                         |                      |                         |                        |                  |                                                                 | Summary of Findings   |                       |                          |                              |                                                                                                                   |
| Participants (studies) Follow up                                                                   | Risk of bias            | Inconsistency        | Indirectness            | Imprecision            | Publication bias | Overall quality of evidence                                     | Study event rates (%) |                       | Relative effect (95% CI) | Anticipated absolute effects |                                                                                                                   |
|                                                                                                    |                         |                      |                         |                        |                  |                                                                 | With Normal Diet      | With Anthocyanin Rich |                          | Risk with Normal Diet        | Risk difference with Anthocyanin Rich (95% CI)                                                                    |
| <b>Butanoic Acid</b> (Better indicated by lower values)                                            |                         |                      |                         |                        |                  |                                                                 |                       |                       |                          |                              |                                                                                                                   |
| 1048 (23 studies)                                                                                  | no serious risk of bias | serious <sup>1</sup> | no serious indirectness | no serious imprecision | undetected       | ⊕⊕⊕⊕<br>HIGH <sup>1</sup><br>due to inconsistency, large effect | 524                   | 524                   | -                        |                              | The mean butanoic acid in the intervention groups was <b>1.15 standard deviations higher</b> (0.41 to 1.9 higher) |

<sup>1</sup> High heterogeneity

S Figure 12: SCFA data quality assessment using GRADE tool.



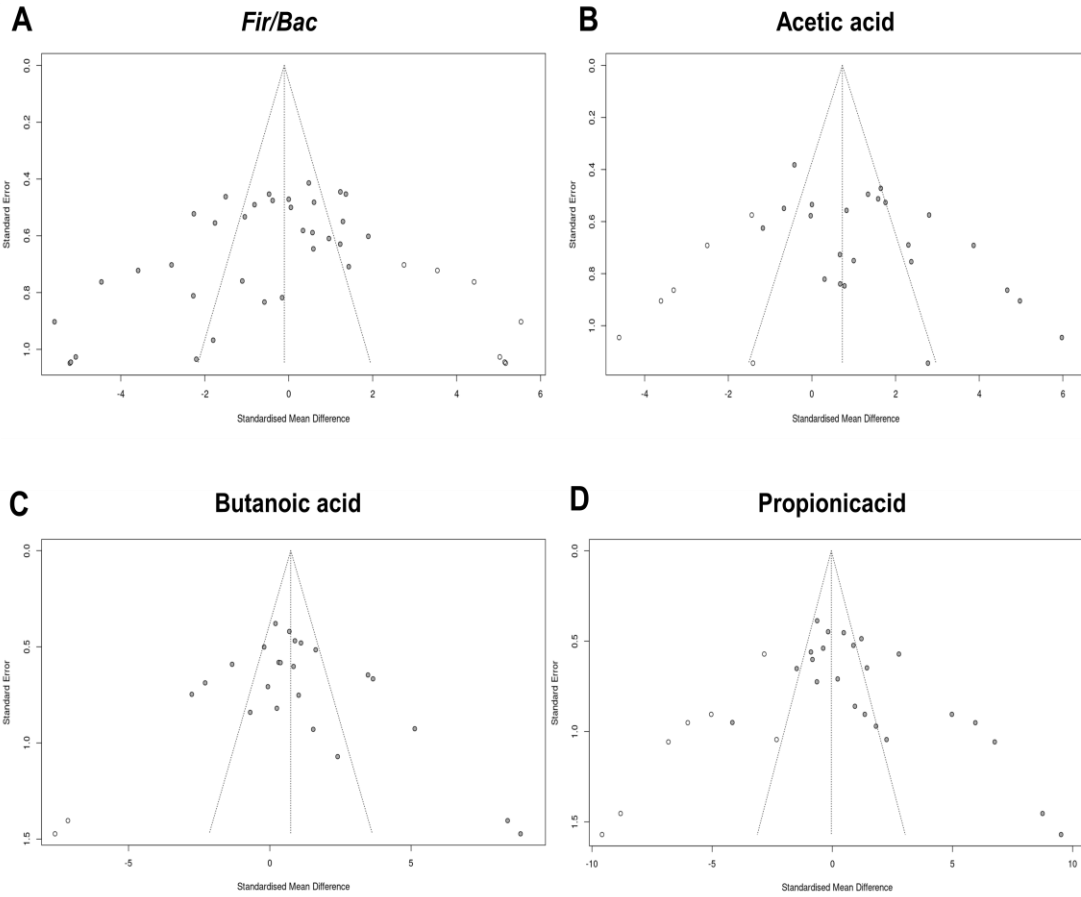

**S Figure 13: Funnel plots for publication bias assessment**(A) For *Fir/Bac* using data from 41 studies. (B) For Acetic acid using data from 29 studies. (C) For Butanoic acid using data from 25 studies. (D) For Propionic acid using data from 30 studies.

The plot was created by putting the standard error on the y-axis and SMD on the x-axis

**A**

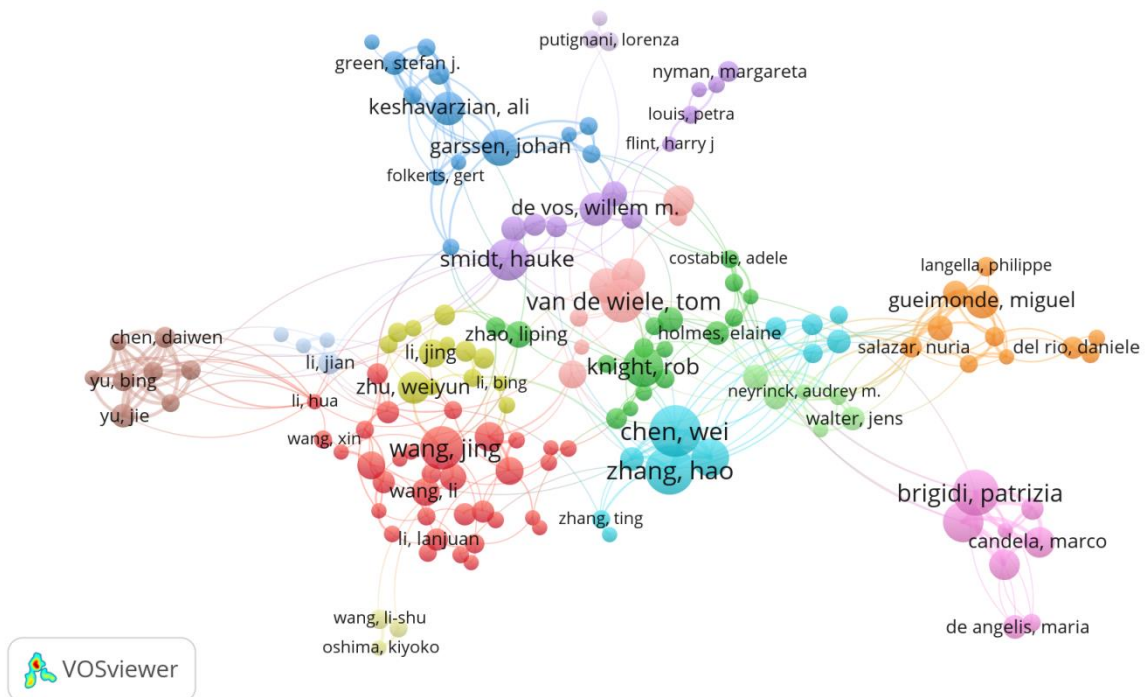



**B**

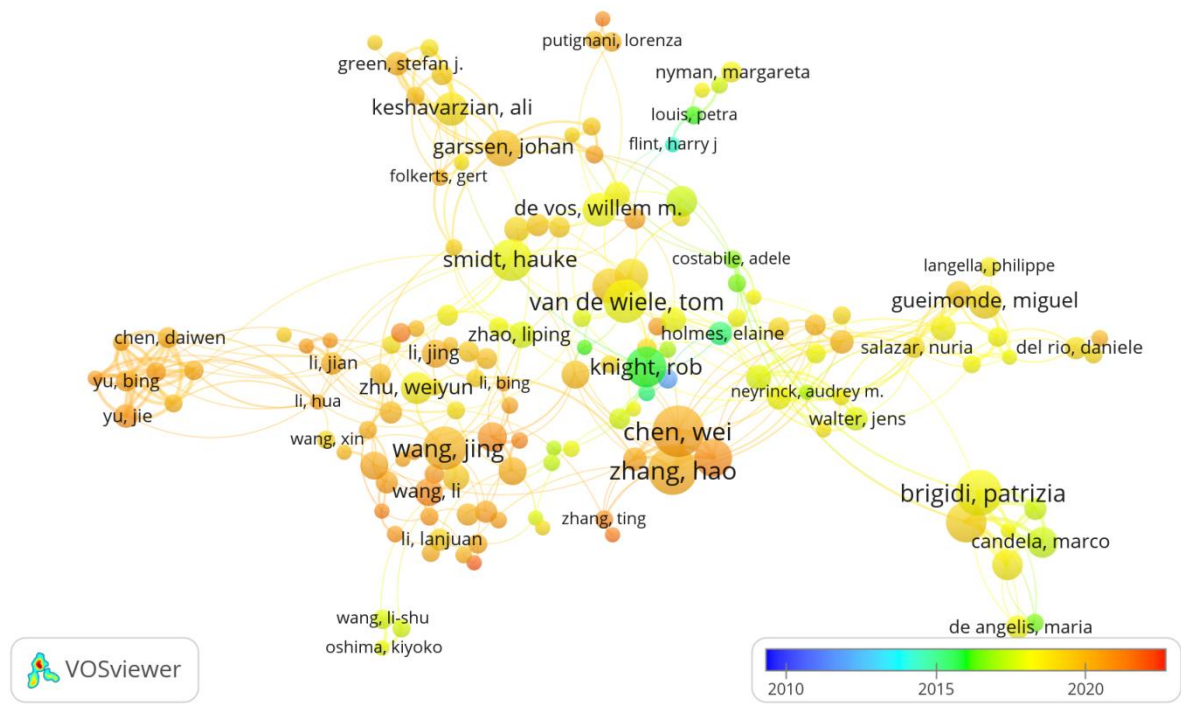

**S Figure 14: Bibliographic coupling of leading researchers in anthocyanin, gut microbiota and SCFA research (A) Network visualization (B) Overlay visualization (year wise)**

**A**

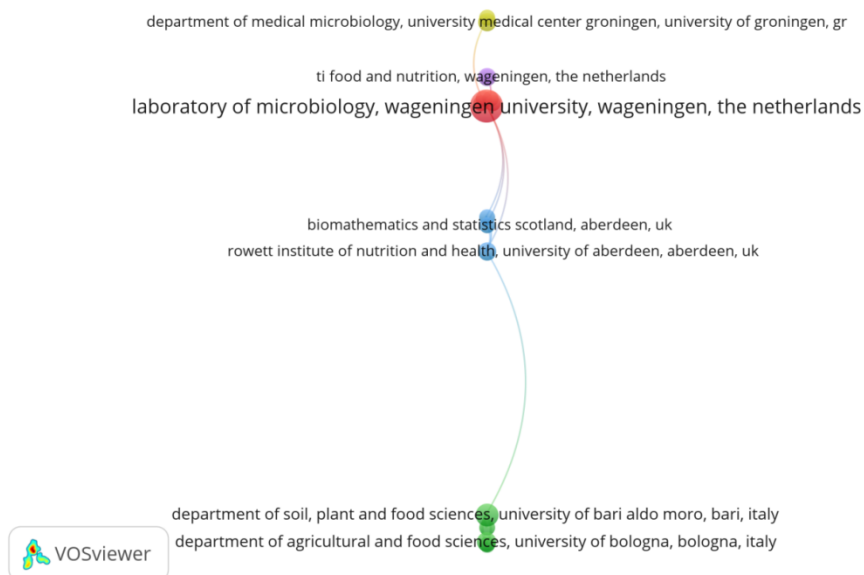

**B**

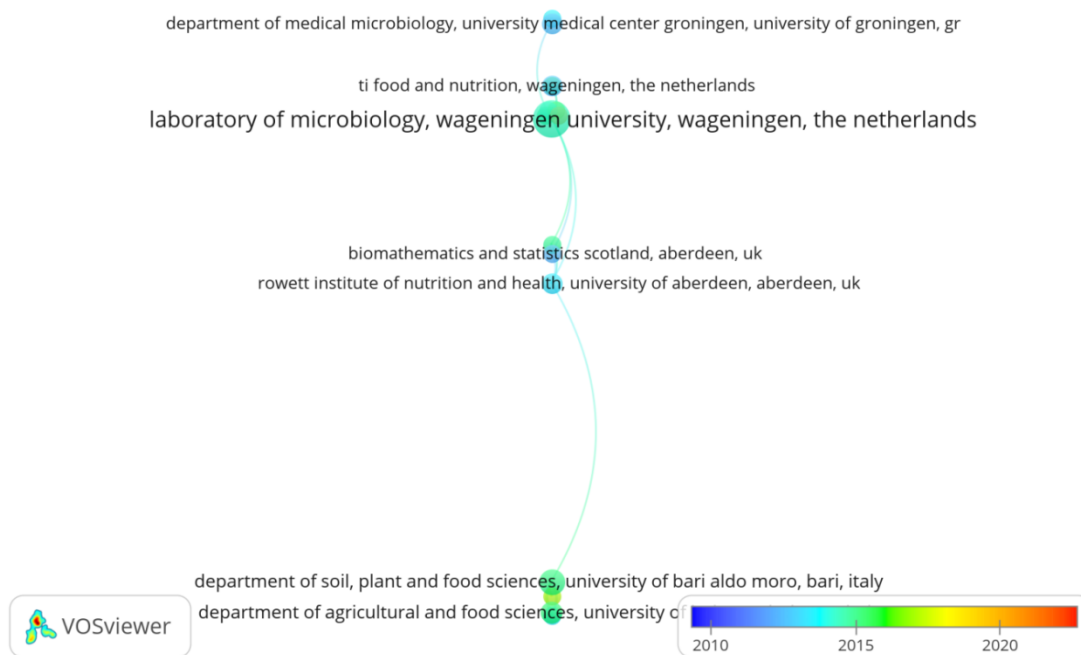

**S Figure 15: Institutional collaborations for anthocyanin, gut microbiota and SCFA research**  
**(A) Network visualization (B) Overlay visualization (year wise)**

**A**

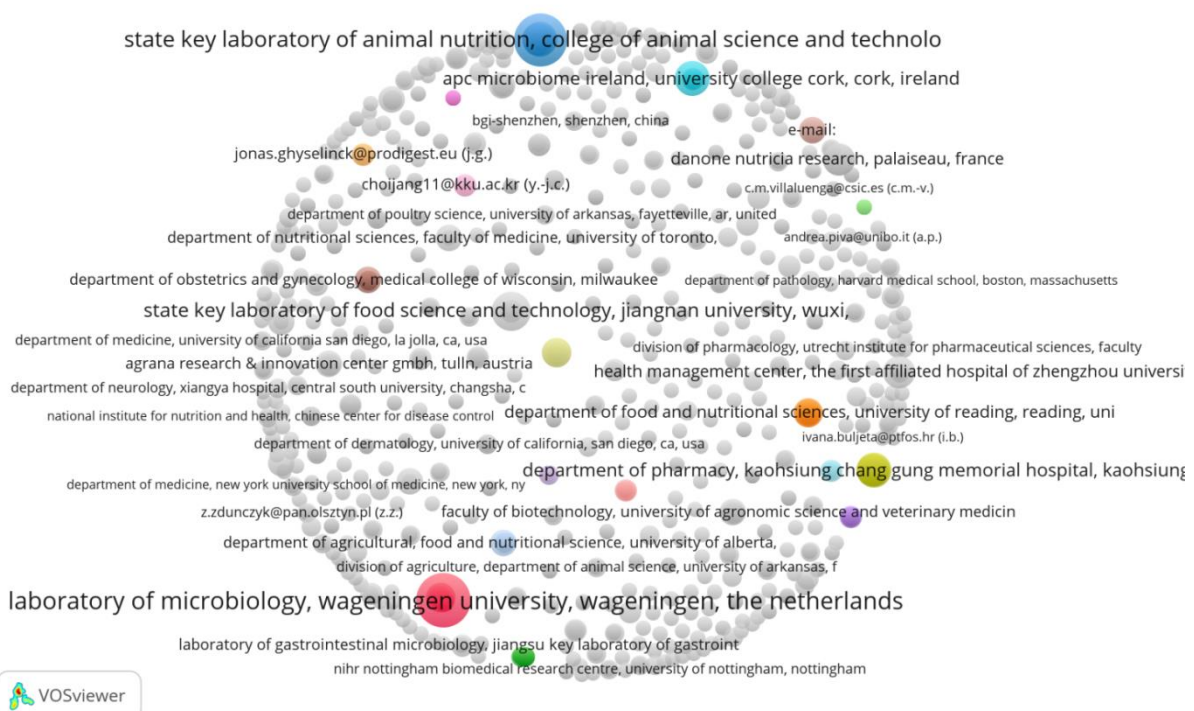

**B**

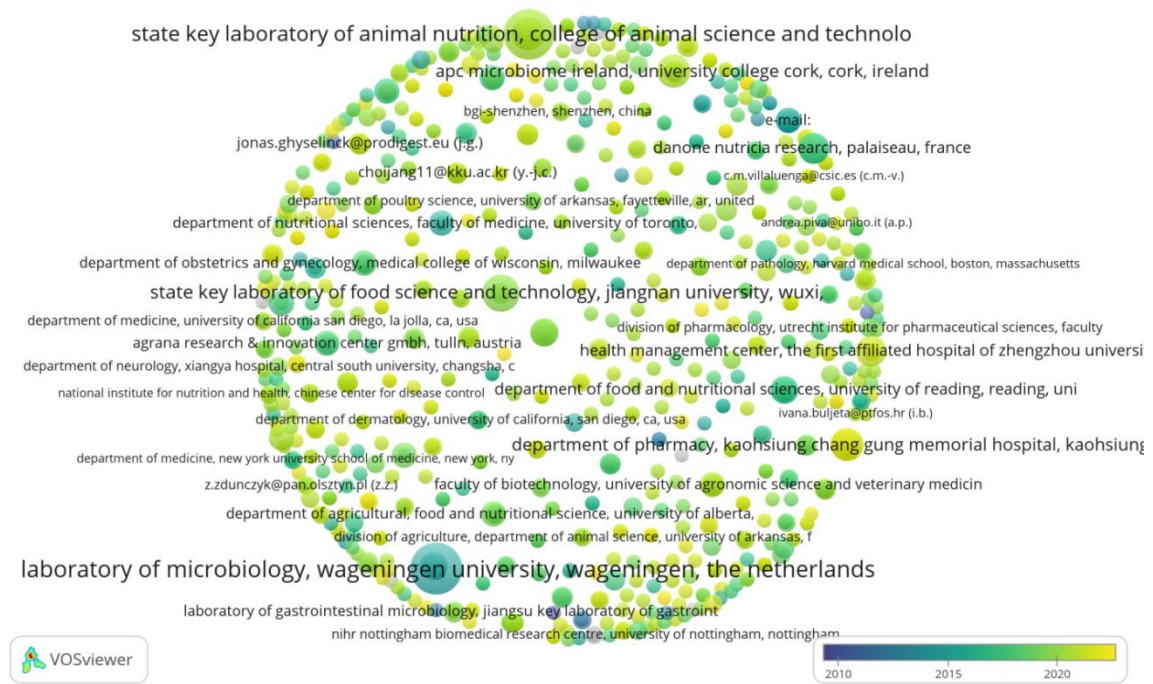

**S Figure 16: Independent institutional collaborations for anthocyanin, gut microbiota and SCFA research (A) Network visualization (B) Overlay visualization (year wise)**
